# Supplementary figures and images for: Selective eradication of cancer displaying hyperactive Akt by exploiting the metabolic consequences of Akt activation
Source: eLife journal article supplement (doi:10.7554/elife.32213), 2018-04-23

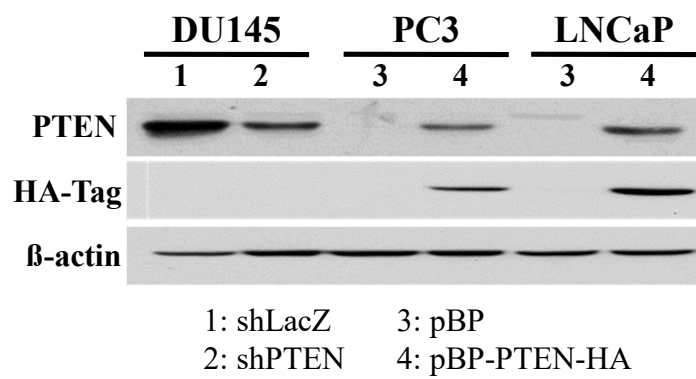

Figure 2s7

Supplement: supp [file elife-32213-supp-v2.zip]

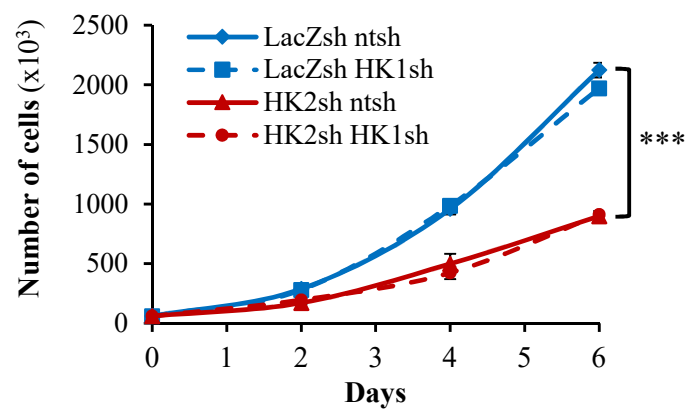

Figure 5s5

Supplement: supp [file elife-32213-supp-v2.zip]

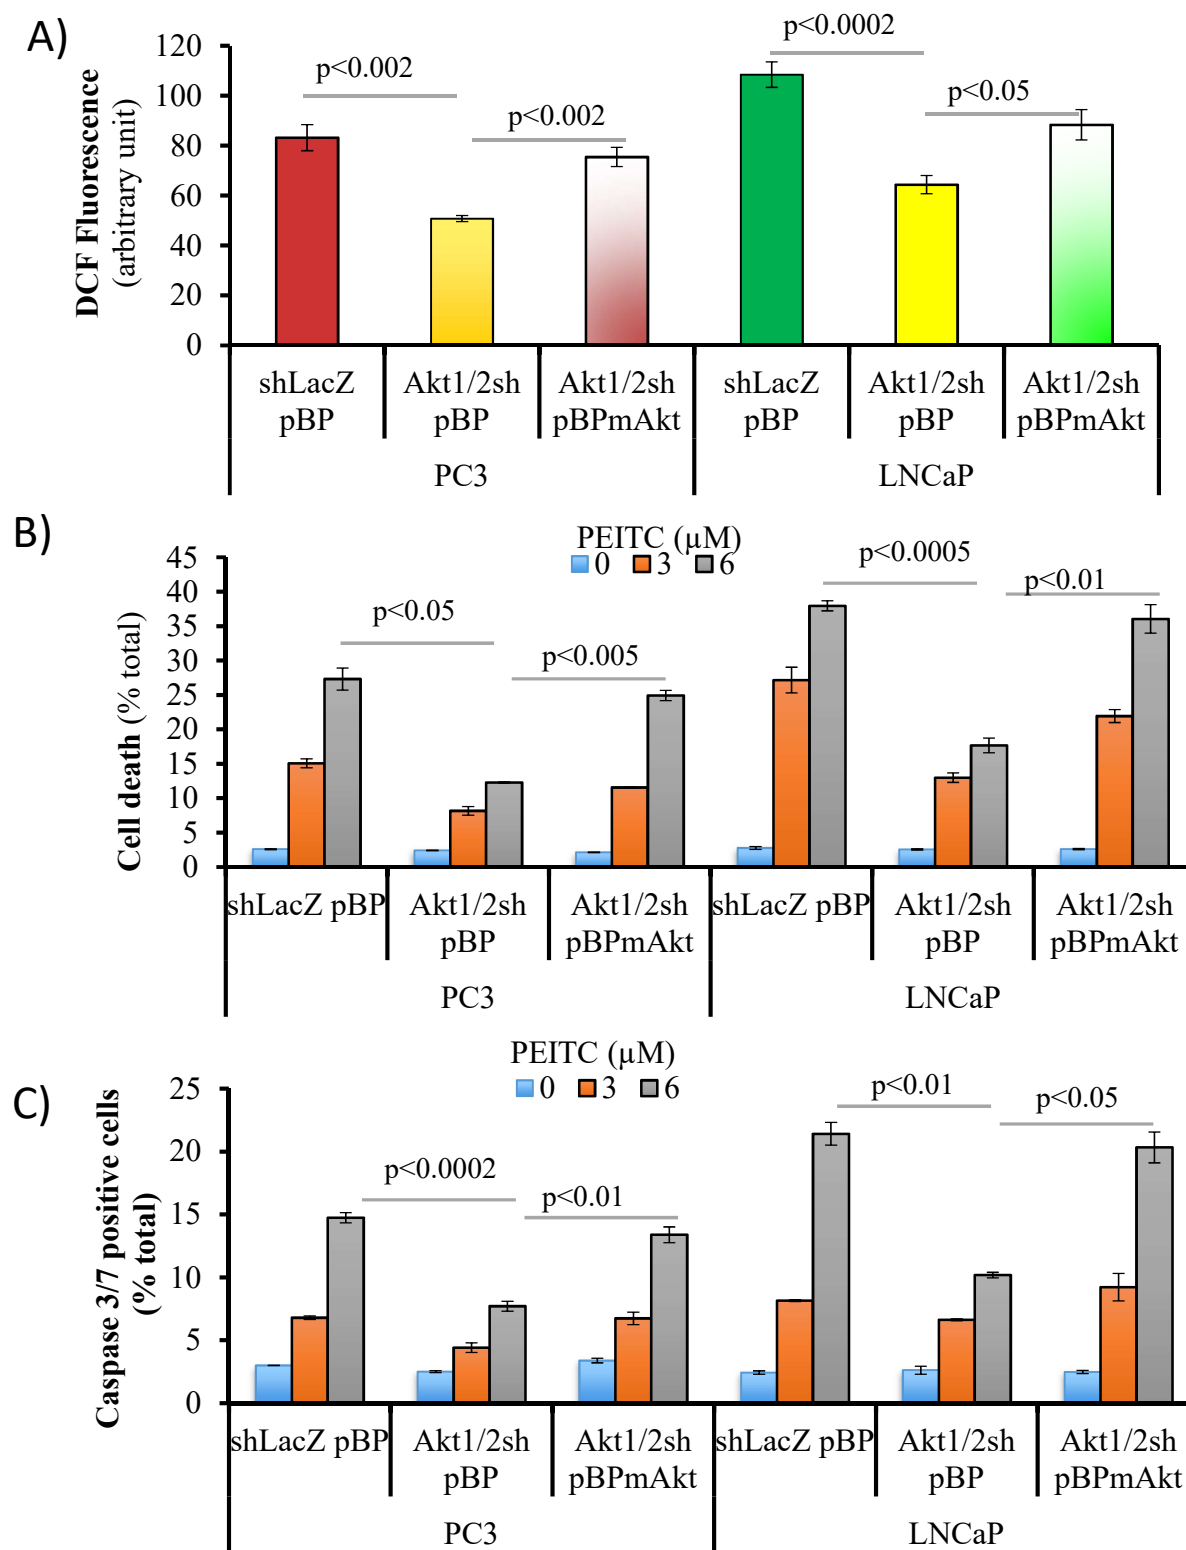

Figure 2s11

Supplement: supp [file elife-32213-supp-v2.zip]

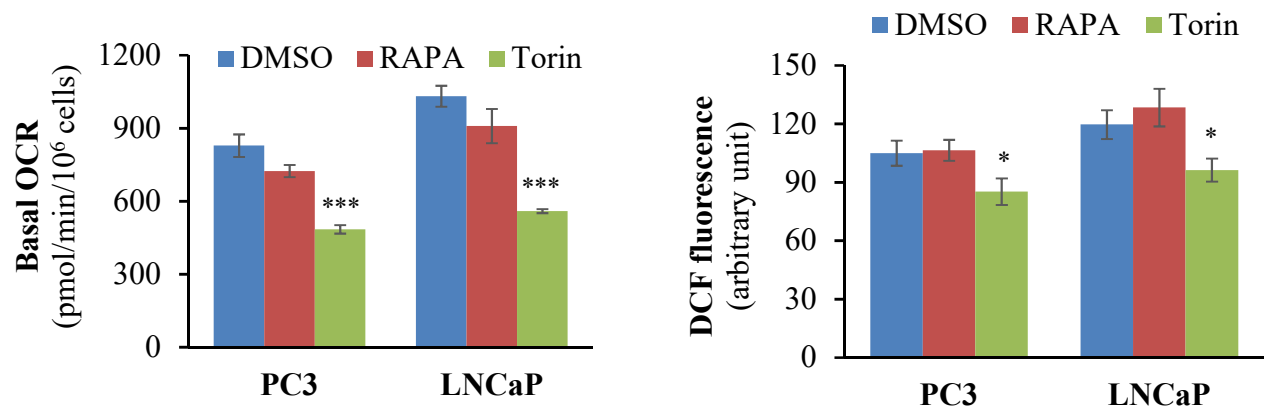

Figure 2s14

Supplement: supp [file elife-32213-supp-v2.zip]

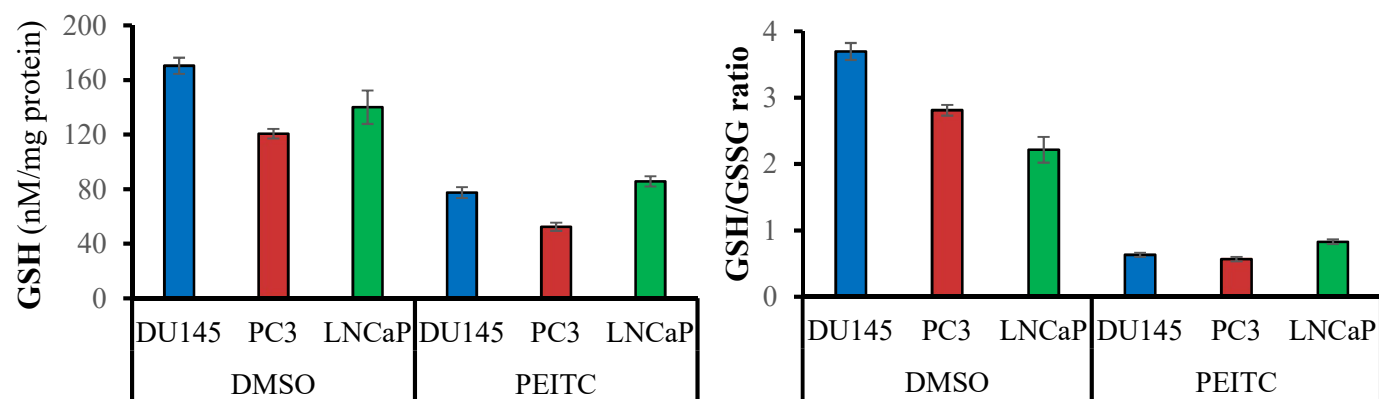

Figure 2s1

Supplement: supp [file elife-32213-supp-v2.zip]

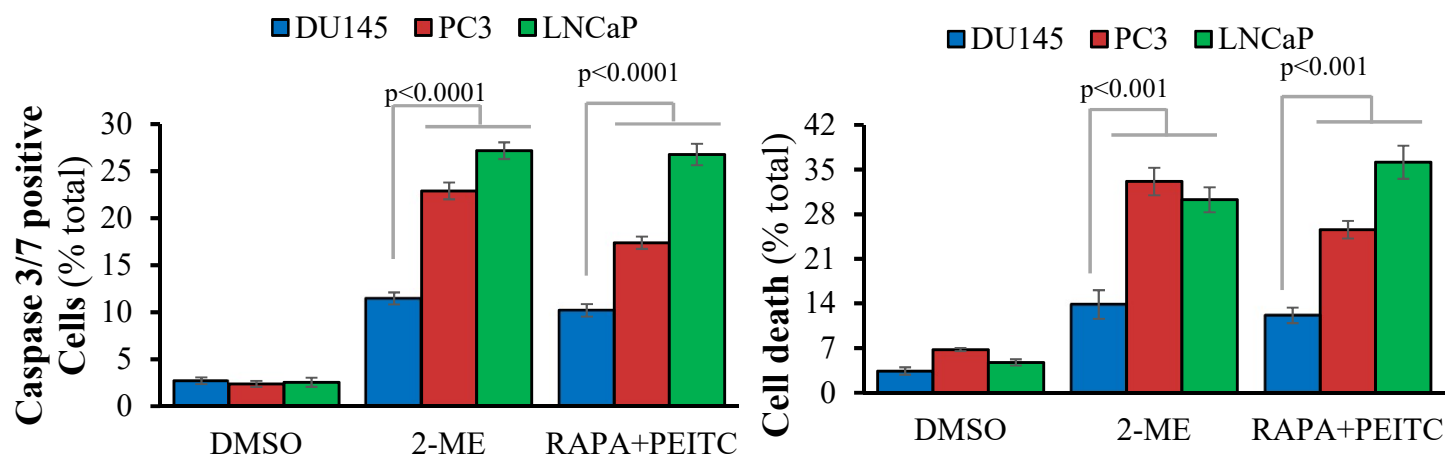

Figure 2s2

Supplement: supp [file elife-32213-supp-v2.zip]

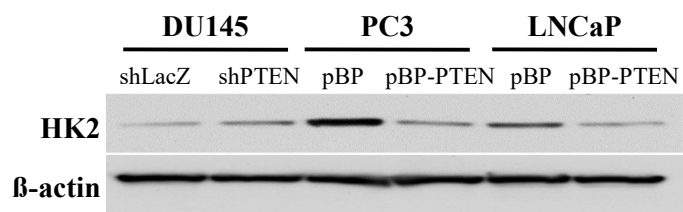

Figure 5s3

Supplement: supp [file elife-32213-supp-v2.zip]

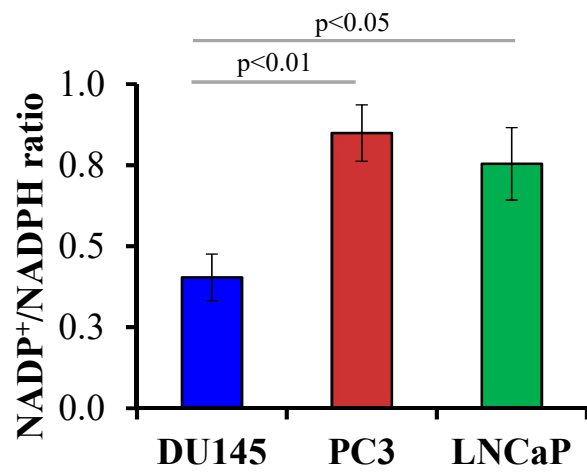

Figure 2s4

Supplement: supp [file elife-32213-supp-v2.zip]

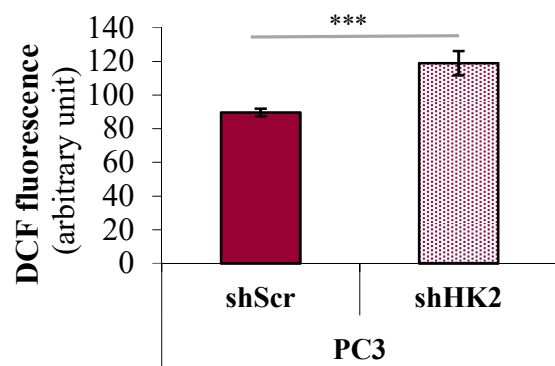

Figure 5s10

Supplement: supp [file elife-32213-supp-v2.zip]

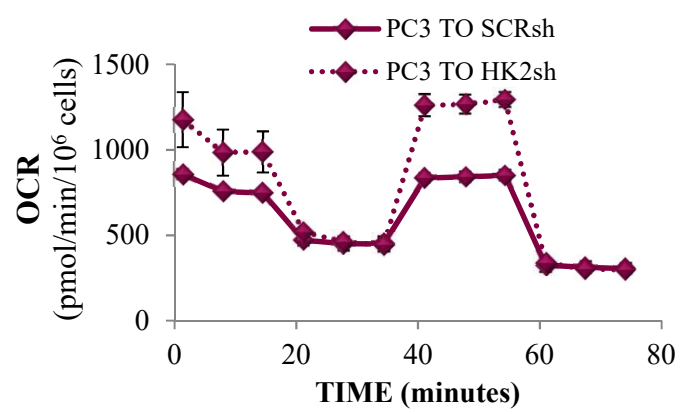

Figure 5s9

Supplement: supp [file elife-32213-supp-v2.zip]

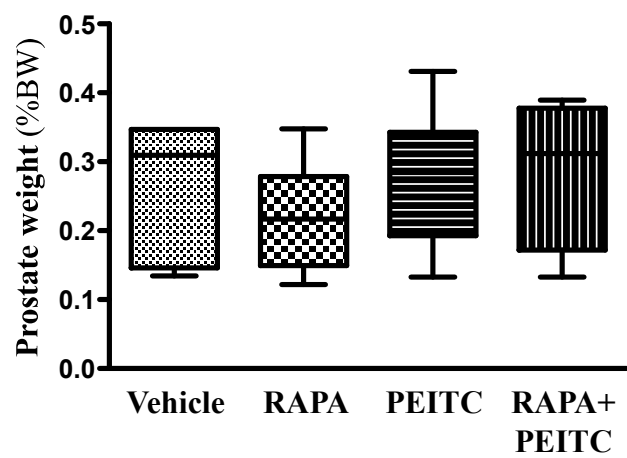

Figure 3s2

Supplement: supp [file elife-32213-supp-v2.zip]

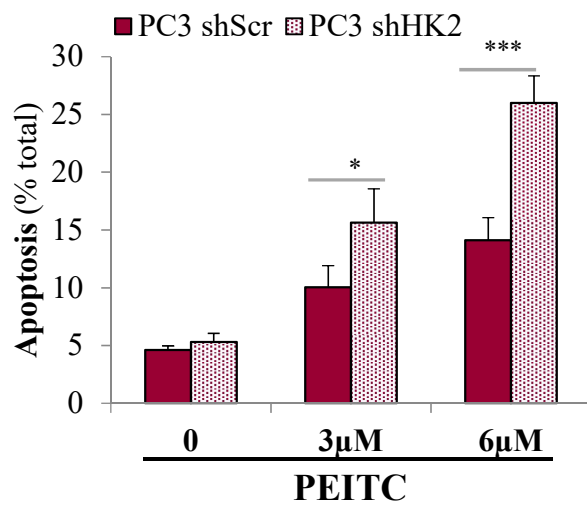

Figure 5s11

Supplement: supp [file elife-32213-supp-v2.zip]

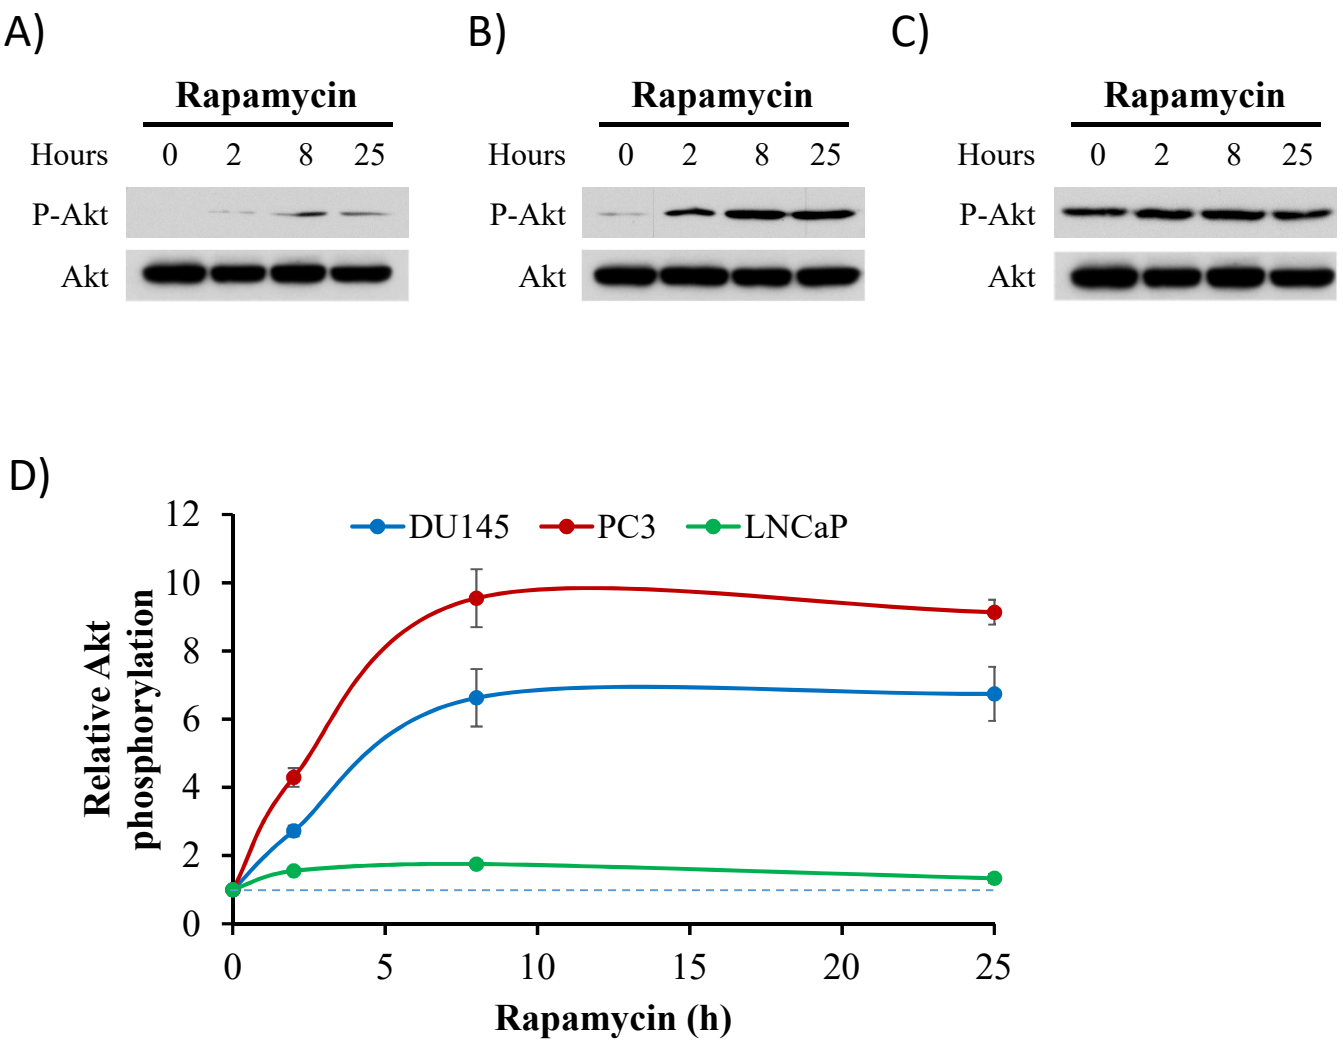

Figure 2s12

Supplement: supp [file elife-32213-supp-v2.zip]

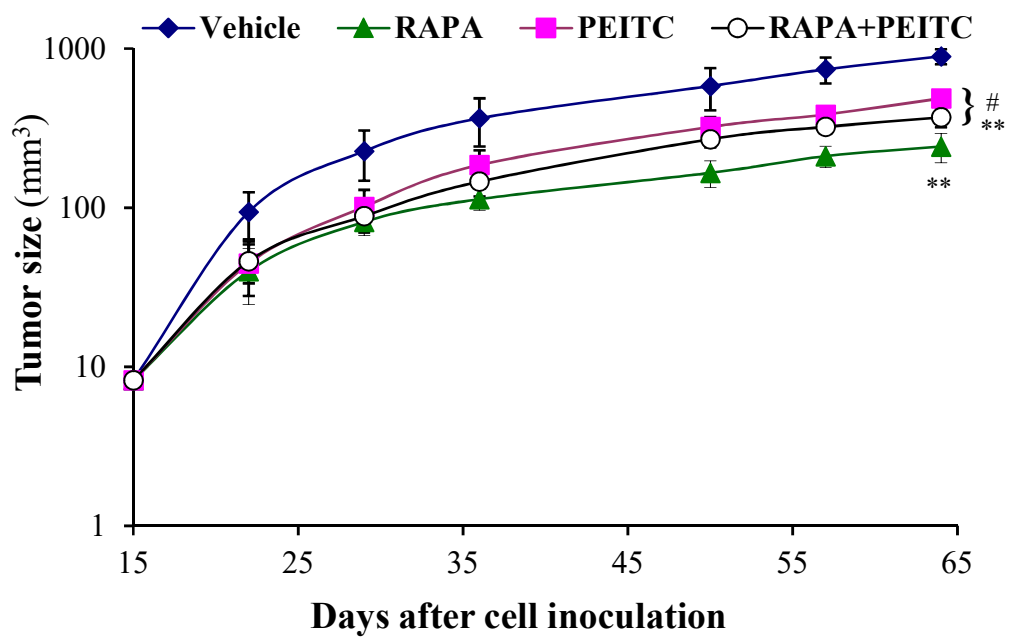

Figure 2s15

Supplement: supp [file elife-32213-supp-v2.zip]

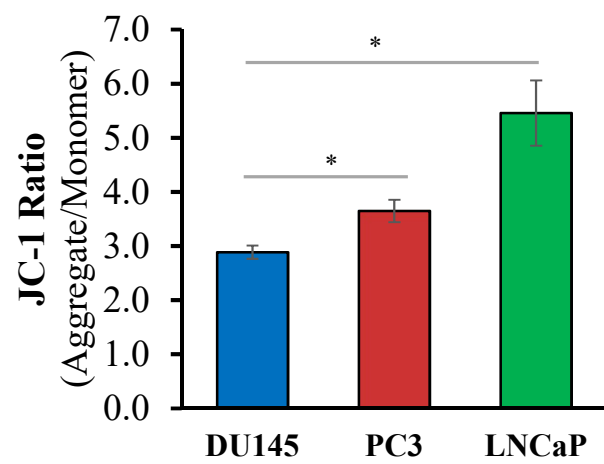

Figure 1s1

Supplement: supp [file elife-32213-supp-v2.zip]

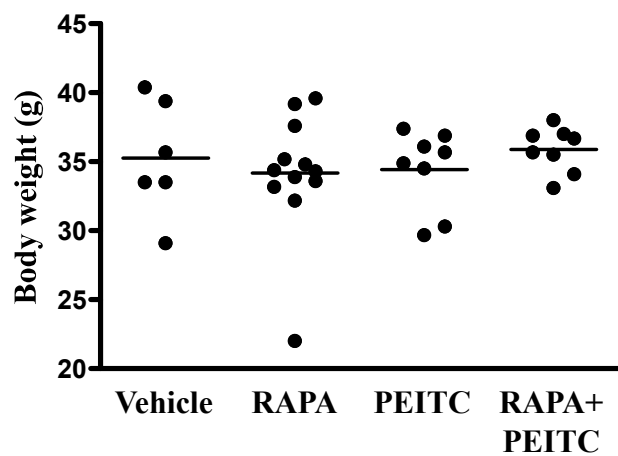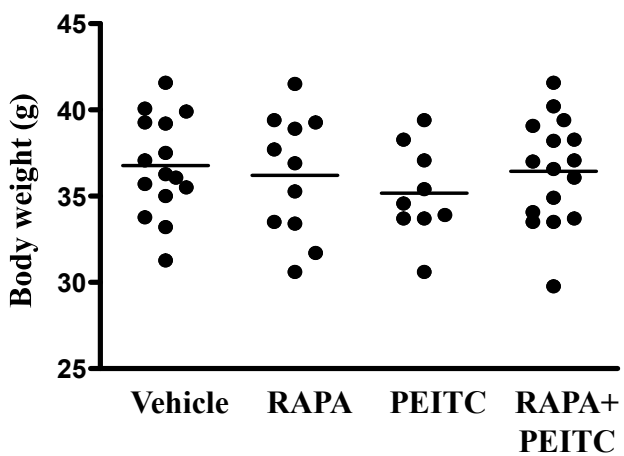

Figure 3s1

Supplement: supp [file elife-32213-supp-v2.zip]

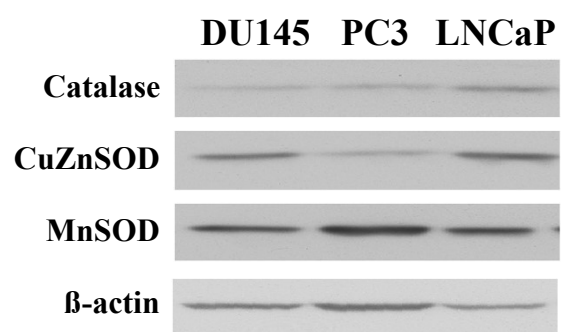

Figure 1s2

Supplement: supp [file elife-32213-supp-v2.zip]

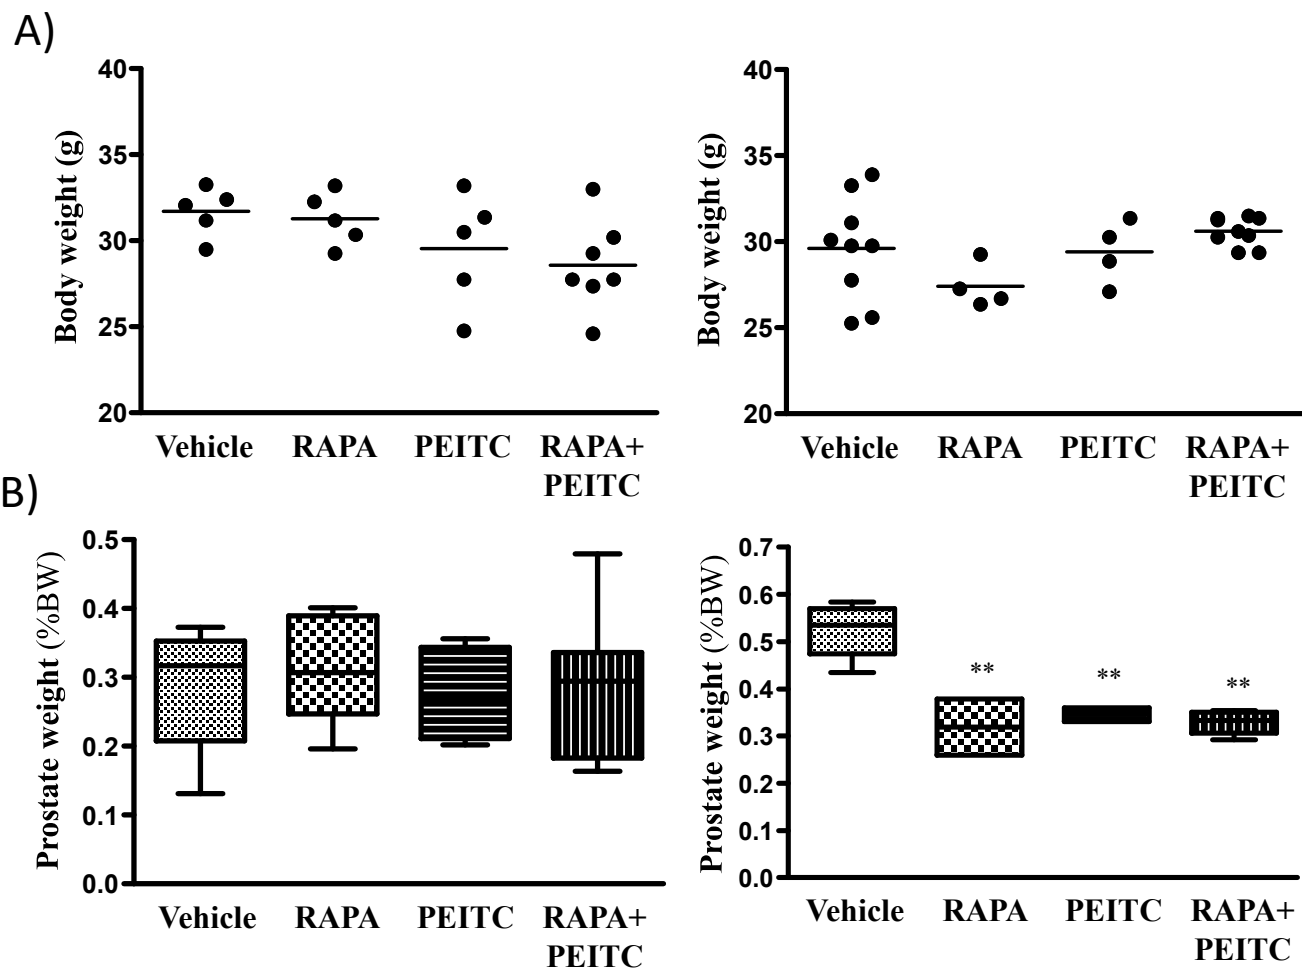

Supplement: supp [file elife-32213-supp-v2.zip]

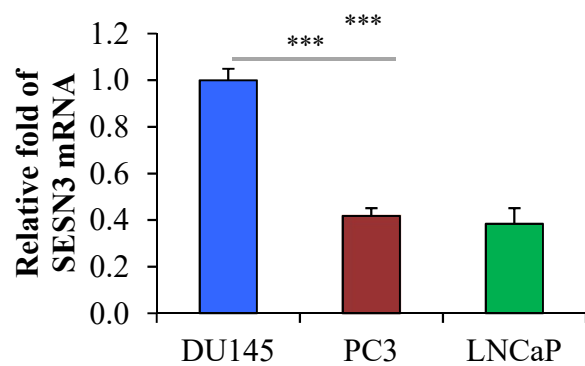

Figure 1s3

Supplement: supp [file elife-32213-supp-v2.zip]

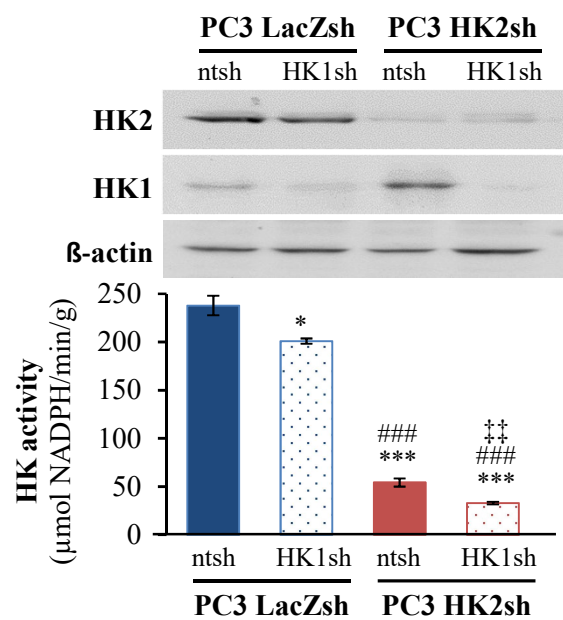

Figure 5s4

Supplement: supp [file elife-32213-supp-v2.zip]

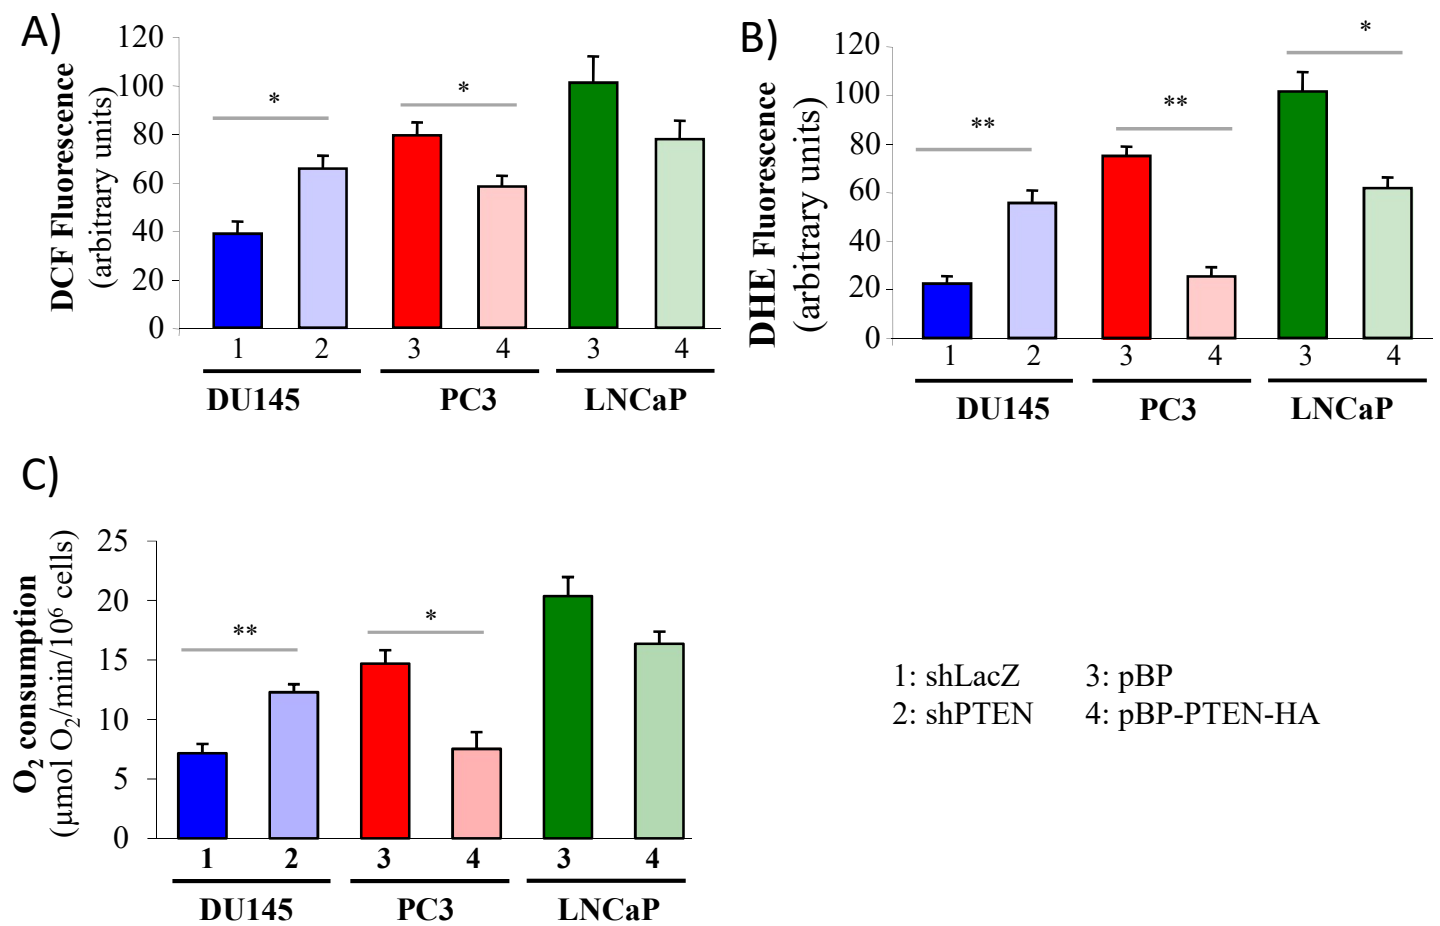

Figure 2s8

Supplement: supp [file elife-32213-supp-v2.zip]

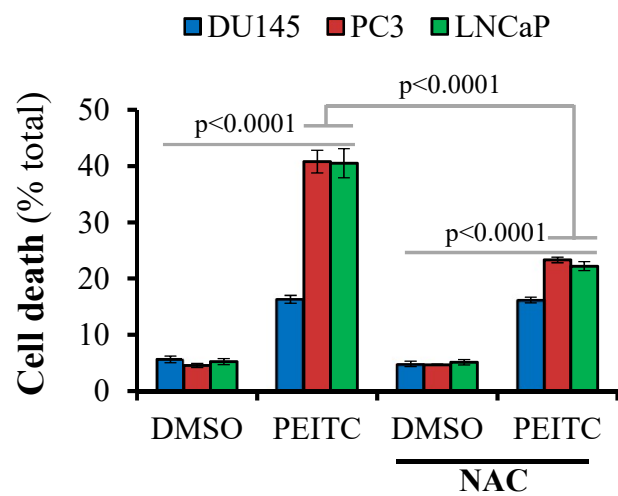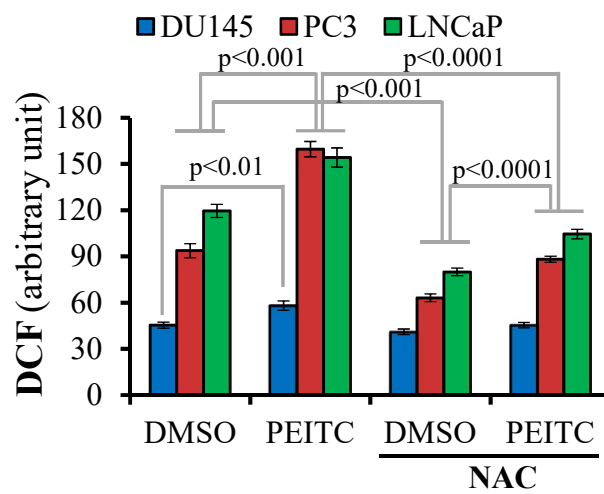

Figure 2s6

Supplement: supp [file elife-32213-supp-v2.zip]

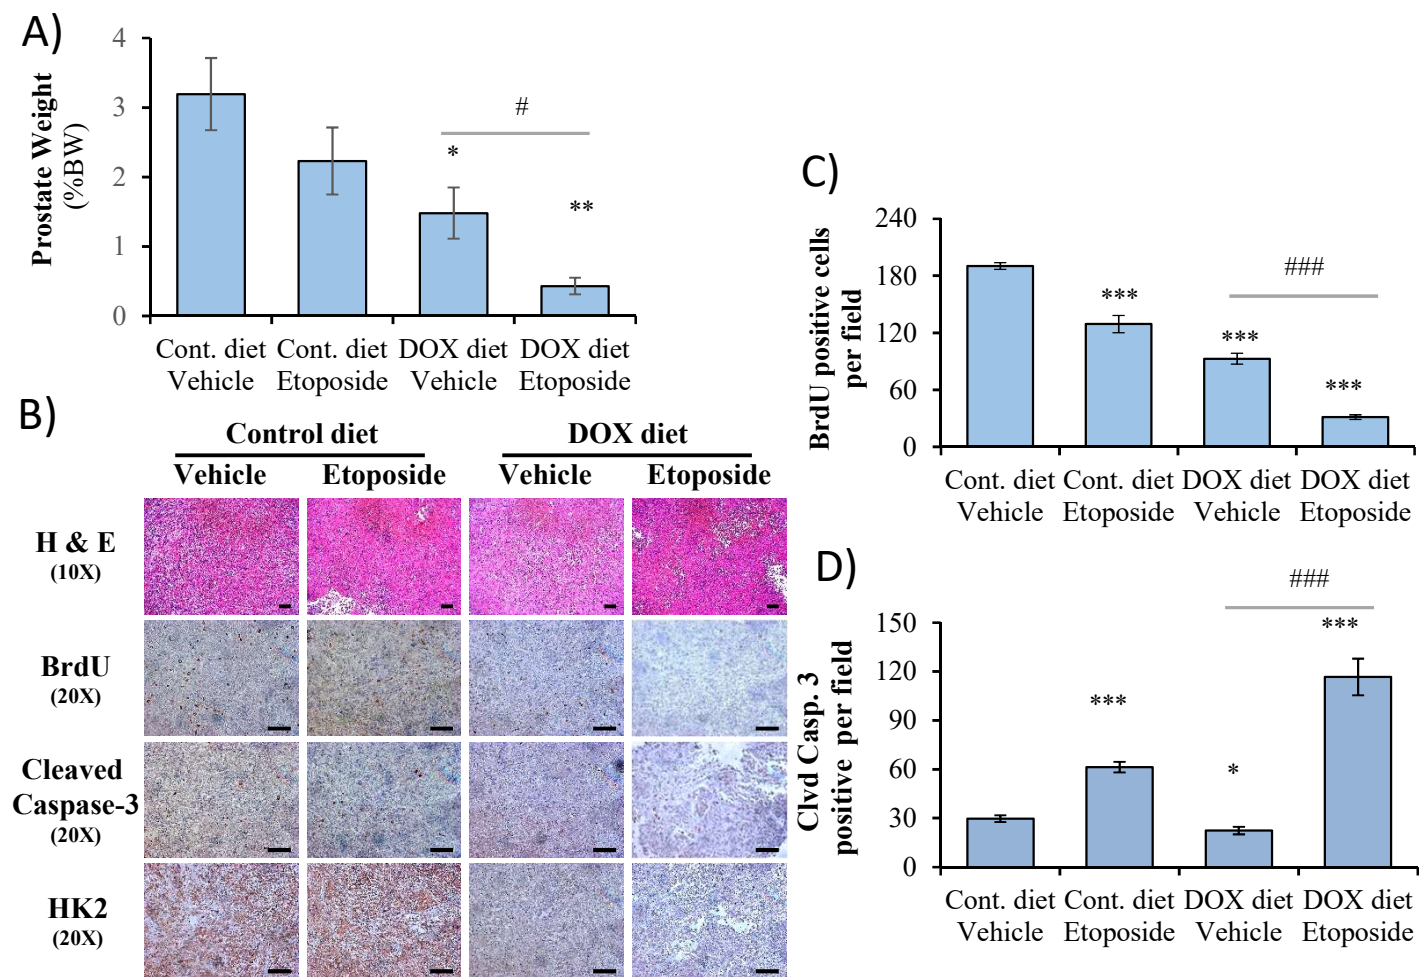

Figure 5s7

Supplement: supp [file elife-32213-supp-v2.zip]

|                         | —                                                                                  | R+P                                                                                 | NAC                                                                                   |
|-------------------------|------------------------------------------------------------------------------------|-------------------------------------------------------------------------------------|---------------------------------------------------------------------------------------|
| No PIN                  |                                                                                    | 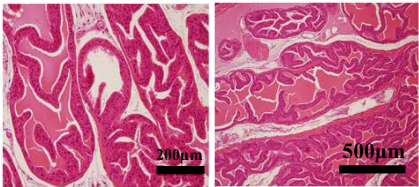  |                                                                                       |
| Low Grade PIN           |                                                                                    |    |                                                                                       |
| High Grade PIN          |   |    |                                                                                       |
| Microinvasive Carcinoma |  |  |  |
| Invasive Carcinoma      |                                                                                    |                                                                                     |  |

Figure 3s3

Supplement: supp [file elife-32213-supp-v2.zip]

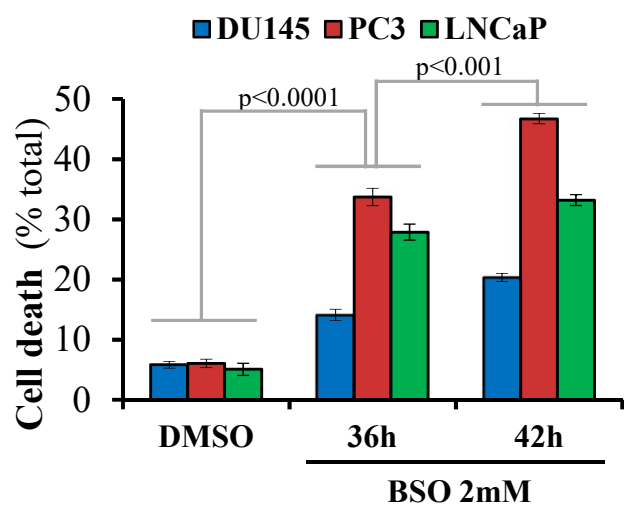

Figure 2s3

Supplement: supp [file elife-32213-supp-v2.zip]

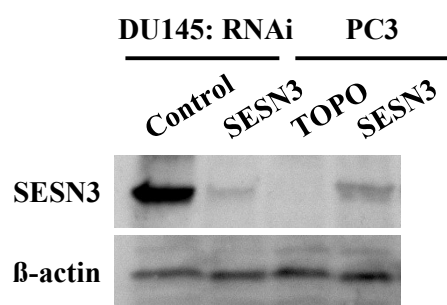

Figure 1s4

Supplement: supp [file elife-32213-supp-v2.zip]

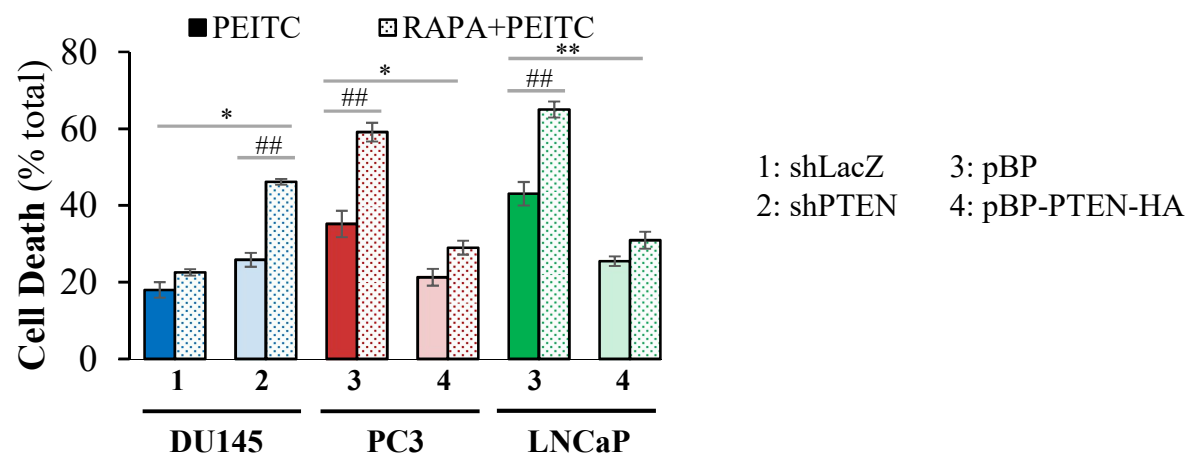

Figure 2s9

Supplement: supp [file elife-32213-supp-v2.zip]

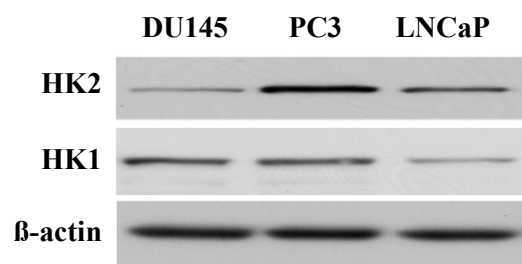

Figure 5s1

Supplement: supp [file elife-32213-supp-v2.zip]

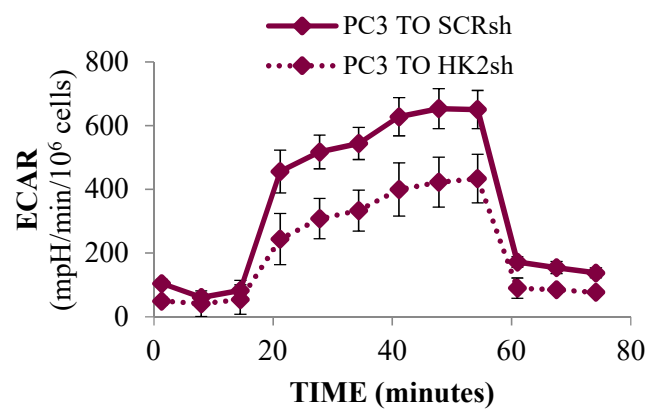

Figure 5s8

Supplement: supp [file elife-32213-supp-v2.zip]

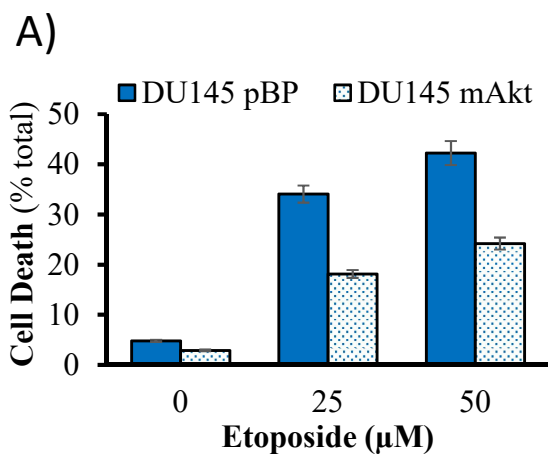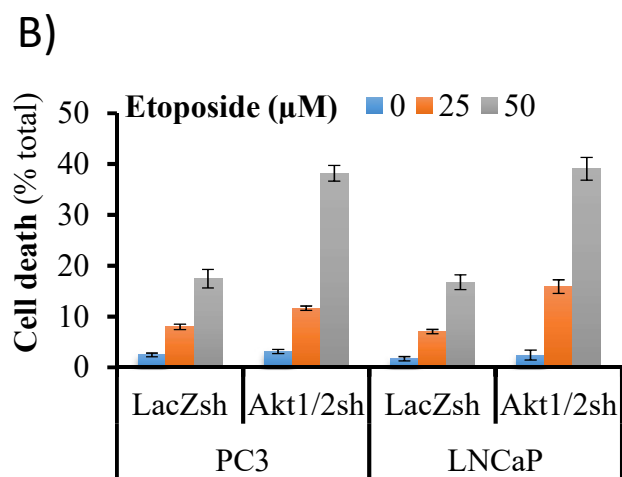

Figure 5s6

Supplement: supp [file elife-32213-supp-v2.zip]

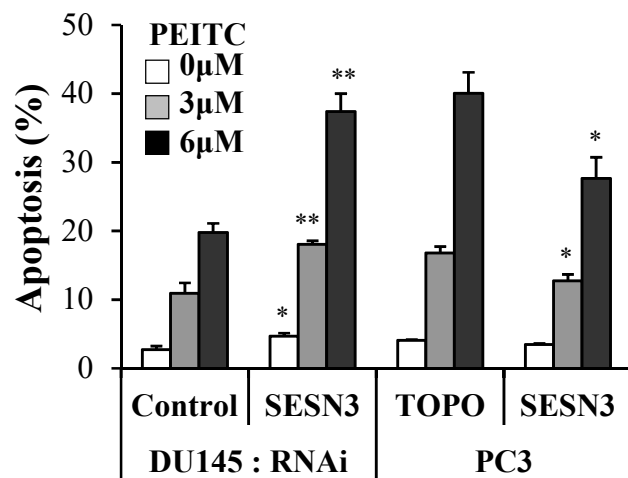

Figure 2s5

Supplement: supp [file elife-32213-supp-v2.zip]

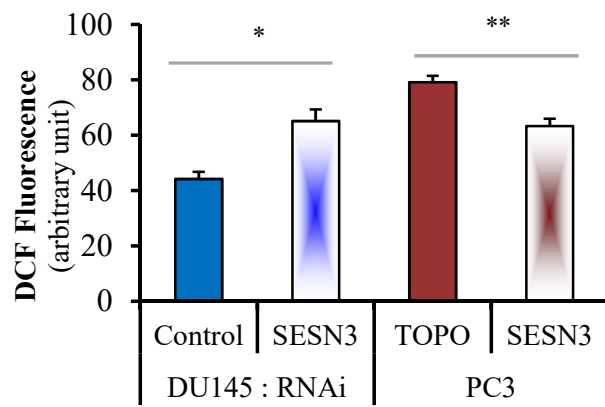

Figure 1s5

Supplement: supp [file elife-32213-supp-v2.zip]

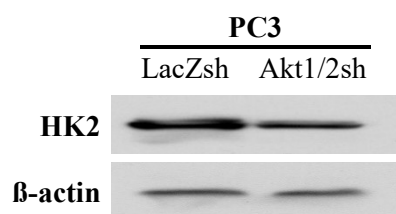

Figure 5s2

Supplement: supp [file elife-32213-supp-v2.zip]

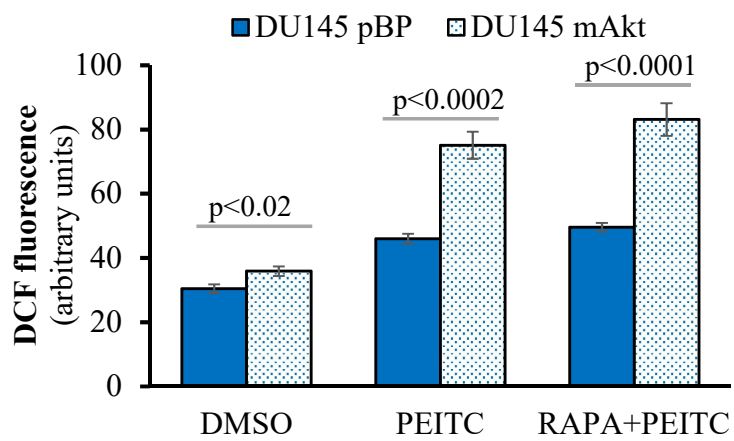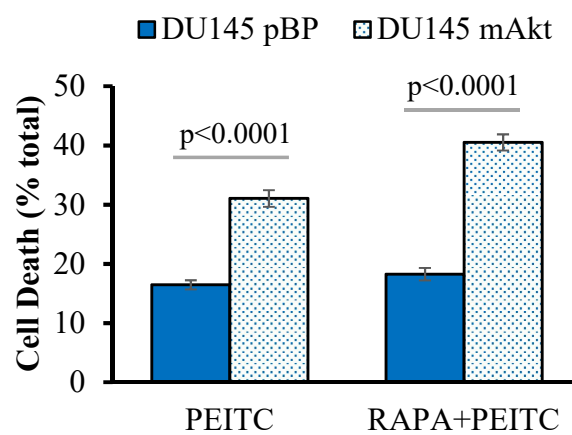

Figure 2s10

Supplement: supp [file elife-32213-supp-v2.zip]

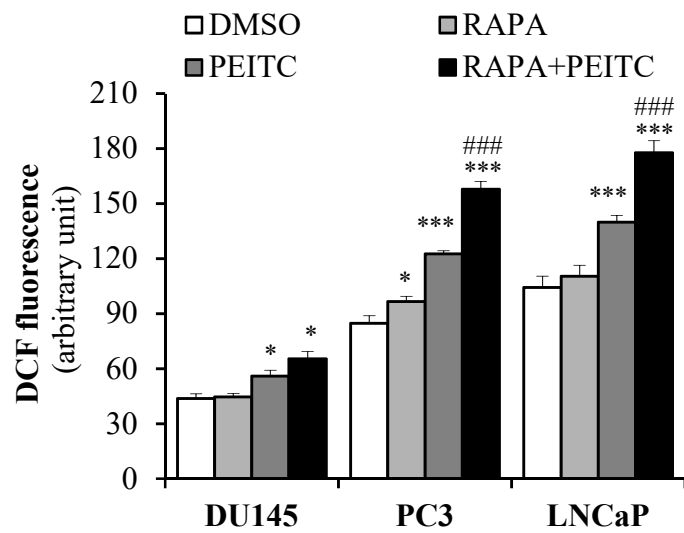

Figure 2s13

Supplement: supp [file elife-32213-supp-v2.zip]
